# Supplementary material for: Reduced presynaptic vesicle stores mediate cellular and network plasticity defects in an early-stage mouse model of Alzheimer’s disease
Source: PubMed Central journal article supplement (PMC6343260; doi:10.1186/s13024-019-0307-7), 2019-01-22

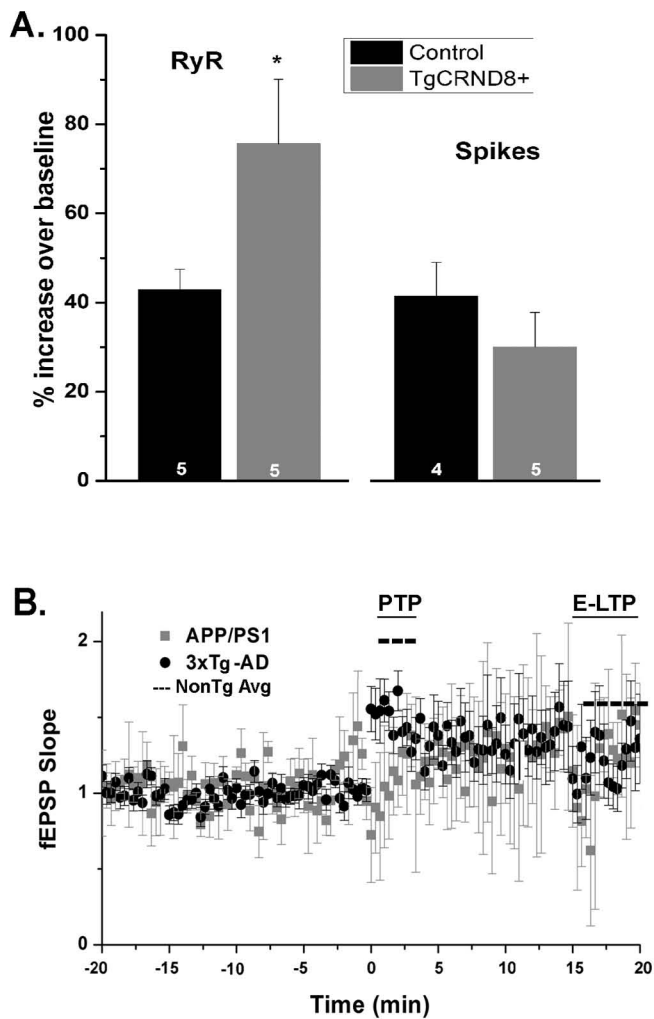

**A.**  $\text{Ca}^{2+}$  increase (%) relative to own baseline response

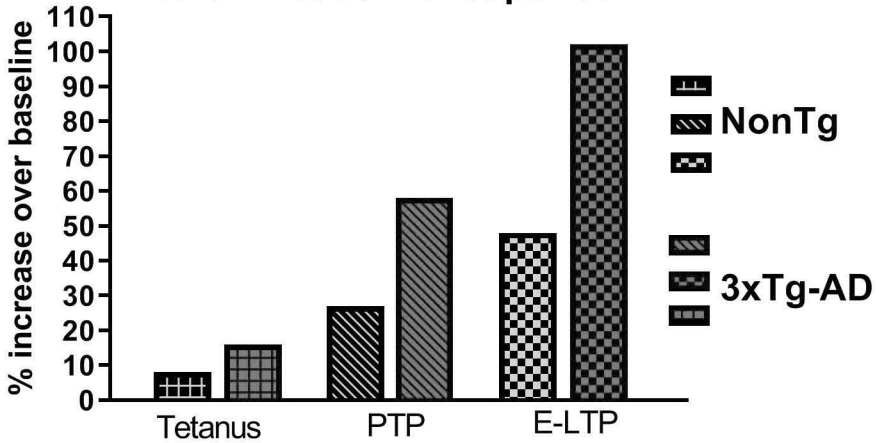

**B.** Fold-increase in 3xTg-AD  $\text{Ca}^{2+}$  response over NonTg response

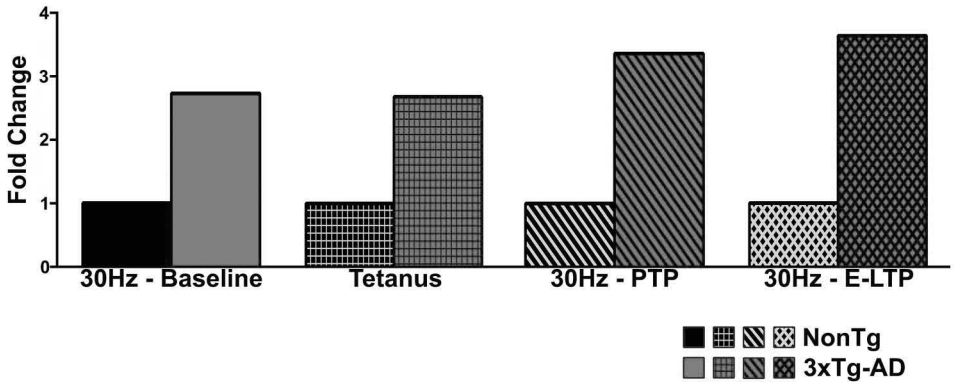

Supplement: 13024_2019_307_MOESM1_ESM.pdf [file 13024_2019_307_MOESM1_ESM.pdf]
